# Supplementary material for: Asymmetric visual input and route recapitulation in homing pigeons
Source: PubMed Central journal article supplement (PMC4614786; doi:10.1098/rspb.2015.1957), 2015-10-07
Supplement: rspb20151957supp1.pdf [file rspb20151957supp1.pdf]

## Electronic Supplementary Material

### *Curve fitting details for Figure 4*

All curves were fitted using the equation  $y = ae^{bx}$ .

Coefficients and goodness of fit:

LRLB Flights 1–18

Coefficients (with 95% confidence bounds):

a = 184.8 (25.49, 344.2)

b = -0.05244 (-0.1559, 0.05105)

Goodness of fit:

SSE: 2.271e+05

R-square: 0.06127

Adjusted R-square: 0.002601

RMSE: 119.1

LRLB Flights 19–36

Coefficients (with 95% confidence bounds):

a = -72.33 (-123.6, -21.11)

b = -0.03577 (-0.1135, 0.04197)

Goodness of fit:

SSE: 2.728e+04

R-square: 0.05989

Adjusted R-square: 0.001134

RMSE: 41.29

LRLB Flights 37–41

Coefficients (with 95% confidence bounds):

a = 98.05 (-652.5, 848.6)

b = -0.307 (-3.716, 3.102)

Goodness of fit:

SSE: 4.817e+04

R-square: 0.0742

Adjusted R-square: -0.2344

RMSE: 126.7

LRLB Flights 42–46

Coefficients (with 95% confidence bounds):

$$\begin{aligned} a &= -49.34 \text{ } (-89.03, -9.653) \\ b &= 0.08863 \text{ } (-0.1333, 0.3105) \end{aligned}$$

Goodness of fit:  
SSE: 598.7  
R-square: 0.3341  
Adjusted R-square: 0.1122  
RMSE: 14.13

#### RLRB Flights 1–18

Coefficients (with 95% confidence bounds):

$$\begin{aligned} a &= -302.6 \text{ } (-412.4, -192.9) \\ b &= -0.03731 \text{ } (-0.07745, 0.002829) \end{aligned}$$

Goodness of fit:  
SSE: 1.235e+05  
R-square: 0.189  
Adjusted R-square: 0.1383  
RMSE: 87.85

#### RLRB Flights 19–36

Coefficients (with 95% confidence bounds):

$$\begin{aligned} a &= 1661 \text{ } (-3127, 6448) \\ b &= -1.649 \text{ } (-4.376, 1.077) \end{aligned}$$

Goodness of fit:  
SSE: 1.114e+05  
R-square: 0.4802  
Adjusted R-square: 0.4477  
RMSE: 83.46

#### RLRB Flights 37–41

Coefficients (with 95% confidence bounds):

$$\begin{aligned} a &= -120.9 \text{ } (-279.7, 38.02) \\ b &= 0.07576 \text{ } (-0.2912, 0.4427) \end{aligned}$$

Goodness of fit:  
SSE: 9118  
R-square: 0.1366  
Adjusted R-square: -0.1512  
RMSE: 55.13

RLRB Flights 42–46

Coefficients (with 95% confidence bounds):

$$a = -41.37 \quad (-92.54, 9.797)$$

$$b = 0.1723 \quad (-0.1461, 0.4907)$$

Goodness of fit:

SSE: 1399

R-square: 0.4783

Adjusted R-square: 0.3044

RMSE: 21.59

## *Classical Pigeon Metrics*

### *Efficiency scores*

Route efficiency is calculated as the beeline distance from release point to home loft divided by the total distance travelled. Mean efficiency is given for the selection of flights indicated.

|                   | <u>Phase 1,</u><br><u>Flights 1-5</u> | <u>Phase 1,</u><br><u>Flights 14-18</u> | <u>All Phase 1</u><br><u>Flights</u> | <u>Phase 2,</u><br><u>Flights 1-5</u> | <u>Phase 2,</u><br><u>Flights 14-18</u> | <u>All Phase 2</u><br><u>Flights</u> | <u>All Phase 3</u><br><u>Flights</u> | <u>All Phase</u><br><u>4 Flights</u> |
|-------------------|---------------------------------------|-----------------------------------------|--------------------------------------|---------------------------------------|-----------------------------------------|--------------------------------------|--------------------------------------|--------------------------------------|
| <u>LRLB Birds</u> | 0.582                                 | 0.711                                   | 0.669                                | 0.711                                 | 0.699                                   | 0.709                                | 0.670                                | 0.798                                |
| <u>RLRB Birds</u> | 0.616                                 | 0.705                                   | 0.683                                | 0.642                                 | 0.784                                   | 0.729                                | 0.721                                | 0.792                                |
| <u>Controls</u>   | 0.695                                 | 0.759                                   | 0.759                                |                                       |                                         |                                      |                                      |                                      |

### *Homing time scores*

Homing time is the time, in seconds, from release to landing at loft.

|                   | <u>Phase 1,</u><br><u>Flights 1-5</u> | <u>Phase 1,</u><br><u>Flights 14-18</u> | <u>All Phase 1</u><br><u>Flights</u> | <u>Phase 2,</u><br><u>Flights 1-5</u> | <u>Phase 2,</u><br><u>Flights 14-18</u> | <u>All Phase 2</u><br><u>Flights</u> | <u>All Phase 3</u><br><u>Flights</u> | <u>All Phase</u><br><u>4 Flights</u> |
|-------------------|---------------------------------------|-----------------------------------------|--------------------------------------|---------------------------------------|-----------------------------------------|--------------------------------------|--------------------------------------|--------------------------------------|
| <u>LRLB Birds</u> | 641.2                                 | 307.0                                   | 473.2                                | 328.9                                 | 352.1                                   | 361.7                                | 475.6                                | 439.9                                |
| <u>RLRB Birds</u> | 510.4                                 | 324.6                                   | 440.0                                | 373.3                                 | 306.1                                   | 339.7                                | 379.3                                | 266.7                                |
| <u>Controls</u>   | 251.1                                 | 548.3                                   | 329.8                                |                                       |                                         |                                      |                                      |                                      |

### *Virtual vanishing bearing scores*

Virtual vanishing bearing is the direction of flight, relative to the release point, when the bird first exceeds a distance of 2.5km from the release point. It is expressed in degrees, with 0 or 360 indicating North, 90 East, 180 South, and 270 West

|                   | <u>Phase 1,</u><br><u>Flights 1-5</u> | <u>Phase 1,</u><br><u>Flights 14-18</u> | <u>All Phase 1</u><br><u>Flights</u> | <u>Phase 2,</u><br><u>Flights 1-5</u> | <u>Phase 2,</u><br><u>Flights 14-18</u> | <u>All Phase 2</u><br><u>Flights</u> | <u>All Phase 3</u><br><u>Flights</u> | <u>All Phase</u><br><u>4 Flights</u> |
|-------------------|---------------------------------------|-----------------------------------------|--------------------------------------|---------------------------------------|-----------------------------------------|--------------------------------------|--------------------------------------|--------------------------------------|
| <u>LRLB Birds</u> | 185.8                                 | 192.1                                   | 190.3                                | 198.4                                 | 196.3                                   | 197.6                                | 193.7                                | 196.4                                |
| <u>RLRB Birds</u> | 225.4                                 | 203.3                                   | 209.4                                | 189.6                                 | 196.6                                   | 192.6                                | 201.1                                | 195.1                                |
| <u>Controls</u>   | 196.2                                 | 193.7                                   | 194.7                                |                                       |                                         |                                      |                                      |                                      |

*Virtual vanishing time scores*

Virtual vanishing time is the time in seconds between release and when the bird reaches the point at which virtual vanishing bearing (above) is taken.

|                   | <u>Phase 1,</u><br><u>Flights 1-5</u> | <u>Phase 1,</u><br><u>Flights 14-18</u> | <u>All Phase 1</u><br><u>Flights</u> | <u>Phase 2,</u><br><u>Flights 1-5</u> | <u>Phase 2,</u><br><u>Flights 14-18</u> | <u>All Phase 2</u><br><u>Flights</u> | <u>All Phase 3</u><br><u>Flights</u> | <u>All Phase</u><br><u>4 Flights</u> |
|-------------------|---------------------------------------|-----------------------------------------|--------------------------------------|---------------------------------------|-----------------------------------------|--------------------------------------|--------------------------------------|--------------------------------------|
| <u>LRLB Birds</u> | 281.8                                 | 189.1                                   | 223.5                                | 218.4                                 | 246.7                                   | 227.6                                | 268.5                                | 185.9                                |
| <u>RLRB Birds</u> | 310.9                                 | 202.0                                   | 245.3                                | 253.9                                 | 208.1                                   | 223.9                                | 317.7                                | 210.0                                |
| <u>Controls</u>   | 199.8                                 | 195.6                                   | 185.8                                |                                       |                                         |                                      |                                      |                                      |

## Final Flights, Phases 1 & 2

— Phase 1, flights 14-18  
— Phase 2, flights 14-18

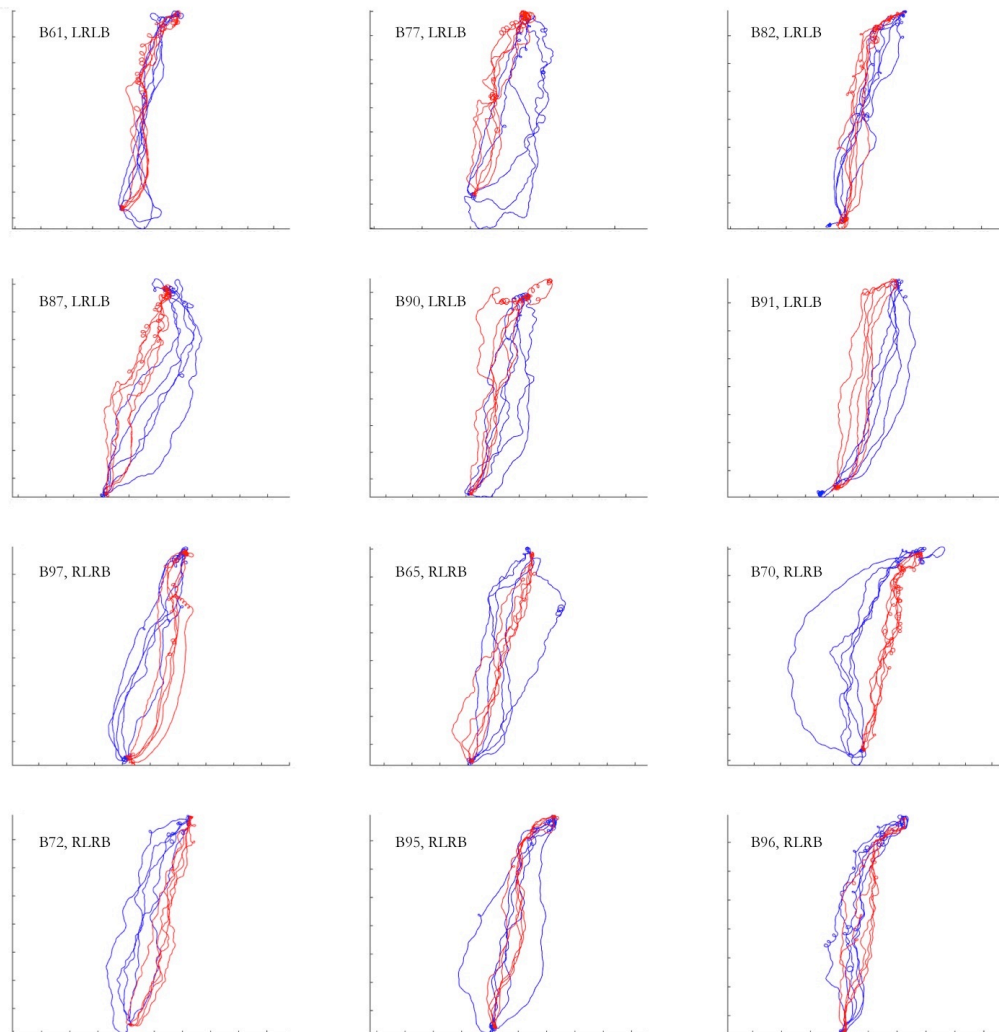

**Figure S1. All birds' end-of-phase flights**

This figure shows the traces of the last five flights in each of Phases 1 (blue) and 2 (red) for each of the 12 birds in the study. As can be seen, the flights of Phase 2 are generally flown over a different route from that flown during Phase 1. Neither group displayed a tendency to 'settle' back to their Phase 1 route in Phase 2.
